# Supplementary material for: Effect of Grinding and the Mill Type on Magnetic Properties of Carboxylated Multiwall Carbon Nanotubes
Source: MDPI journal article supplement (doi:10.3390/ma14144057), 2021-07-20

## Supplementary Materials

# Effect of Grinding and the Mill Type on Magnetic Properties of Carboxylated Multiwall Carbon Nanotubes

Agnieszka Jamrozik <sup>1</sup>, Janusz Przewoznik <sup>2</sup>, Sonia Krysiak <sup>2</sup>, Jozef Korecki <sup>3</sup>, Grzegorz Trykowski <sup>4</sup>, Artur Małolepszy <sup>5</sup>, Leszek Stobiński <sup>5</sup> and Kvetoslava Burda <sup>2,\*</sup>

<sup>1</sup> Institute of Physical Chemistry, Polish Academy of Sciences, ul. Kasprzaka 44/52, 01-224 Warsaw, Poland; [ajamrozik@ichf.edu.pl](mailto:ajamrozik@ichf.edu.pl)

<sup>2</sup> Faculty of Physics and Applied Computer Science, AGH—University of Science and Technology; al. Mickiewicza 30, 30-059 Kraków, Poland; [januszp@agh.edu.pl](mailto:januszp@agh.edu.pl) (J.P.); [Sonia.Krysiak@fis.agh.edu.pl](mailto:Sonia.Krysiak@fis.agh.edu.pl) (S.K.)

<sup>3</sup> Jerzy Haber Institute of Catalysis and Surface Chemistry, Polish Academy of Sciences, ul. Niezapominajek 8, 30-239 Krakow, Poland; [korecki@agh.edu.pl](mailto:korecki@agh.edu.pl)

<sup>4</sup> Faculty of Chemistry, Nicolaus Copernicus University in Torun, ul. Gagarina 7, 87-100 Torun, Poland; [tryki@chem.umk.pl](mailto:tryki@chem.umk.pl)

<sup>5</sup> Faculty of Chemical and Process Engineering, Warsaw University of Technology, ul. Waryńskiego 1, 00-645 Warsaw, Poland; [Artur.Malolepszy@pw.edu.pl](mailto:Artur.Malolepszy@pw.edu.pl) (A.M.); [leszek.stobinski@pw.edu.pl](mailto:leszek.stobinski@pw.edu.pl) (L.S.)

\* Correspondence: [kvetoslava.burda@fis.agh.edu.pl](mailto:kvetoslava.burda@fis.agh.edu.pl); Tel.: +48-126172991, Fax: +48-126340010

**Citation:** Jamrozik, A.; Przewoznik, J.; Krysiak, S.; Korecki, J.; Trykowski, G.; Małolepszy, A.; Stobiński, L.; Burda, K. Effect of Grinding and the Mill Type on Magnetic Properties of Carboxylated Multiwall Carbon Nanotubes. *Materials* **2021**, *14*, 4057. <https://doi.org/10.3390/ma14144057>

Academic Editor(s): Gueorgui Gueorguiev

Received: 5 May 2021

Accepted: 5 July 2021

Published: 20 July 2021

**Publisher's Note:** MDPI stays neutral with regard to jurisdictional claims in published maps and institutional affiliations.

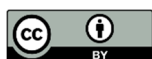

**Copyright:** © 2021 by the authors. Licensee MDPI, Basel, Switzerland. This article is an open access article distributed under the terms and conditions of the Creative Commons Attribution (CC BY) license (<http://creativecommons.org/licenses/by/4.0/>).

**Table 1.** Hyperfine parameters fitted to the Mössbauer spectra measured at 85 K (*IS* – isomer shift related to the metallic Fe, *QS* – quadrupole splitting, *H<sub>hf</sub>* – hyperfine magnetic field,  $\Delta Q$  – quadrupole splitting distribution,  $\Delta H$  – magnetic field distribution, *C* – relative contribution,  $\Gamma$  – line width).

| Types of MWCNTs          | MWCNTs as prepared                                                                     |                        |                                       |                                    |                                        | MWCNTs-COOH                                                                               |                        |                                    |                                        | MWCNTs-COONH <sub>4</sub> |               |                                |                                       |                                    |                                                                                  |
|--------------------------|----------------------------------------------------------------------------------------|------------------------|---------------------------------------|------------------------------------|----------------------------------------|-------------------------------------------------------------------------------------------|------------------------|------------------------------------|----------------------------------------|---------------------------|---------------|--------------------------------|---------------------------------------|------------------------------------|----------------------------------------------------------------------------------|
| Component                | Fe <sub>3</sub> C                                                                      | $\alpha$ - Fe          | Fe <sup>2+</sup> in Fe <sub>x</sub> O | Fe oxides/hydroxides/ferrihydrites | Par Fe <sup>2+</sup> /Fe <sup>3+</sup> | Fe <sub>3</sub> C                                                                         | $\alpha$ - Fe          | Fe oxides/hydroxides/ferrihydrites | Par Fe <sup>2+</sup> /Fe <sup>3+</sup> | Fe <sub>3</sub> C         | $\alpha$ - Fe | Fe <sub>x</sub> C <sub>y</sub> | Fe <sup>2+</sup> in Fe <sub>x</sub> O | Fe oxides/hydroxides/ferrihydrites | Par Fe <sup>2+</sup> /Fe <sup>3+</sup>                                           |
| control                  |                                                                                        |                        |                                       |                                    |                                        |                                                                                           |                        |                                    |                                        |                           |               |                                |                                       |                                    |                                                                                  |
| C[%]                     | 82.2±2.2                                                                               | 3.8±1.2                | 9.4±1.2                               | -                                  | 4.6±0.8                                | 65.7±3.1                                                                                  | 7.0±2/4                | 13.5±2.7                           | 14.0±2.5                               | 41.6±3.2                  | 2.3±2.0       | 3.7±2.0                        | 2.84±1.9                              | -                                  | 49.6±5                                                                           |
| H <sub>hf</sub> [T]      | 24.8<br>$\Delta H=0.6$<br>p=0.8<br><br>24.5<br>$\Delta H=3.5$<br>p=0.2<br><br><H>=24.7 | 33.6<br>$\Delta H=0.7$ | 8.9<br>$\Delta H=1.1$                 | -                                  | -                                      | 25.1<br>$\Delta H=0.54$<br>p=0.78<br><br>25.2<br>$\Delta H=3.0$<br>p=0.22<br><br><H>=22.4 | 34.3<br>$\Delta H=1.1$ | 8.5<br>$\Delta H=3.8$              | -                                      | 24.9<br>$\Delta H=0.46$   | 33.8±1.5      | 13.6<br>$\Delta H=0.05$        | 26.8<br>$\Delta H=0.1$                | -                                  | -                                                                                |
| $\varepsilon$ /QS [mm/s] | < $\varepsilon$ >=-0.005                                                               | 0                      | 0.02±0.04                             | -                                  | 0.73<br>$\Delta Q=0.37$                | < $\varepsilon$ >=-0.009                                                                  | 0                      | -0.09±0.10                         | 0.60<br>$\Delta Q=0.28$                | < $\varepsilon$ >=-0.004  | 0             | 0.04±0.10                      | 0.12±0.17                             | -                                  | Q <sub>1</sub> =0.69<br>$\Delta Q_1=0.22$<br>(37.6%)<br><br>Q <sub>2</sub> =1.20 |

|                          |                                                                                                           |                         |                             |                       |                 |                                                                                                             |                         |                                     |                          |                                        |                         |                 |                        |                       |                                                          |
|--------------------------|-----------------------------------------------------------------------------------------------------------|-------------------------|-----------------------------|-----------------------|-----------------|-------------------------------------------------------------------------------------------------------------|-------------------------|-------------------------------------|--------------------------|----------------------------------------|-------------------------|-----------------|------------------------|-----------------------|----------------------------------------------------------|
|                          |                                                                                                           |                         |                             |                       |                 |                                                                                                             |                         |                                     |                          |                                        |                         |                 |                        |                       | $\Delta Q_2=0.5$<br>(12%)                                |
| IS [mm/s]                | $\langle IS \rangle = 0.20$                                                                               | $-0.01 \pm 0.05$        | $0.89 \pm 0.04$             | -                     | $0.12 \pm 0.06$ | $\langle IS \rangle = 0.21$                                                                                 | $0.06 \pm 0.05$         | $0.39 \pm 0.11$                     | $0.40 \pm 0.03$          | $\langle IS \rangle = 0.21$            | $0.06 \pm 0.11$         | $0.19 \pm 0.15$ | $0.99 \pm 0.18$        | -                     | IS <sub>1</sub> =0.38±0.02<br>IS <sub>2</sub> =0.30±0.08 |
| agate mill               |                                                                                                           |                         |                             |                       |                 |                                                                                                             |                         |                                     |                          |                                        |                         |                 |                        |                       |                                                          |
| C[%]                     | 82.1±2.1                                                                                                  | 6.1±1.0                 | 3.4±1.1                     | 8.6±0.6               | -               | 82.6±5.8                                                                                                    | 6.7±3.0                 | -                                   | 10.6±1.9                 | 48.5±2.1                               | 3.1±1.6                 | -               | 4.8±1.8                | 9.0±2.3               | 34.5±2.5                                                 |
| H <sub>hf</sub> [T]      | 25.1<br>$\Delta H=0.77$<br>p=0.8<br><br>25.1<br>$\Delta H=6.8$<br>p=0.2<br><br>$\langle H \rangle = 25.1$ | 34.2<br>$\Delta H=0.78$ | 17.2<br>$\Delta H=1.0$      | 4.8<br>$\Delta H=1.6$ | -               | 25.1<br>$\Delta H=0.46$<br>p=0.76<br><br>23.7<br>$\Delta H=3.3$<br>p=0.24<br><br>$\langle H \rangle = 24.7$ | 32.8<br>$\Delta H=0.03$ | -                                   | -                        | 24.9<br>$\Delta H=0.29$                | 34.7<br>$\Delta H=0.76$ | -               | 23.7<br>$\Delta H=1.0$ | 8.6<br>$\Delta H=1.7$ | -                                                        |
| $\varepsilon$ /QS [mm/s] | $\langle \varepsilon \rangle = 0.001$                                                                     | 0                       | $0.13 \pm 0.06$             | $0.17 \pm 0.04$       | -               | $\langle \varepsilon \rangle = 0.001$                                                                       | 0                       | -                                   | 0.57<br>$\Delta QS=0.25$ | $\langle \varepsilon \rangle = -0.011$ | 0                       | -               | $0.23 \pm 0.11$        | $0.09 \pm 0.10$       | 0.71<br>$\Delta QS=0.30$                                 |
| IS [mm/s]                | $\langle IS \rangle = 0.20$                                                                               | $-0.03 \pm 0.03$        | $0.74 \pm 0.07$             | $0.34 \pm 0.04$       | -               | $\langle IS \rangle = 0.21$                                                                                 | $0.12 \pm 0.10$         | -                                   | $0.27 \pm 0.08$          | $\langle IS \rangle = 0.20$            | $0.06 \pm 0.10$         | -               | $1.26 \pm 0.13$        | $0.56 \pm 0.12$       | $0.40 \pm 0.01$                                          |
| steel mill               |                                                                                                           |                         |                             |                       |                 |                                                                                                             |                         |                                     |                          |                                        |                         |                 |                        |                       |                                                          |
| C[%]                     | 83.9±2.2                                                                                                  | 6.4±1.0                 | 3.3±0.7                     | -                     | 6.4±0.7         | 15.6±1.4                                                                                                    | 12.8±1.7                | 42.3±3.5                            | 29.2±2.8                 | 44.3±2.7                               | 5.8±1.9                 | -               | 5.2±1.6                | 12.1±2.1              | 32.6±3.7                                                 |
| H <sub>hf</sub> [T]      | 24.8<br>$\Delta H=0.62$<br>p=0.8                                                                          | 34.0<br>$\Delta H=0.73$ | 9.4±0.4<br>$\Delta H=0.008$ | -                     | -               | 25.04<br>$\Delta H=0.67$                                                                                    | 32.2<br>$\Delta H=2.3$  | 55.2<br>$\Delta H=3.2$<br>(p=0.196) | -                        | 24.8<br>$\Delta H=0.28$                | 34.5<br>$\Delta H=0.5$  | -               | 24.1±0.7               | 8.3<br>$\Delta H=1.9$ | -                                                        |

|  |                                   |  |  |  |  |  |  |                                         |  |  |  |  |  |  |
|--|-----------------------------------|--|--|--|--|--|--|-----------------------------------------|--|--|--|--|--|--|
|  | 23.2<br>$\Delta H=9.6$<br>$p=0.2$ |  |  |  |  |  |  | 45.0<br>$\Delta H=3.0$<br>( $p=0.047$ ) |  |  |  |  |  |  |
|  | $\langle H \rangle=24.5$          |  |  |  |  |  |  | 40.0<br>$\Delta H=3.0$<br>( $p=0.103$ ) |  |  |  |  |  |  |
|  |                                   |  |  |  |  |  |  | 35.0<br>$\Delta H=3.0$<br>( $p=0.041$ ) |  |  |  |  |  |  |
|  |                                   |  |  |  |  |  |  | 30.0<br>$\Delta H=3.0$<br>( $p=0.136$ ) |  |  |  |  |  |  |
|  |                                   |  |  |  |  |  |  | 20.0<br>$\Delta H=3.0$<br>( $p=0.155$ ) |  |  |  |  |  |  |
|  |                                   |  |  |  |  |  |  | 15.0<br>$\Delta H=3.0$<br>( $p=0.033$ ) |  |  |  |  |  |  |
|  |                                   |  |  |  |  |  |  | 10.0<br>$\Delta H=3.0$                  |  |  |  |  |  |  |

[illegible]

**Figure 1.** Mössbauer spectra for (a) as prepared MWCNTs, (b) MWCNTs-COOH, and (c) MWCNTs-COONH<sub>4</sub>: left column – the control group, middle column – after using the agate mill, right column – after using the steel mill, measured at 220 K.

220 K

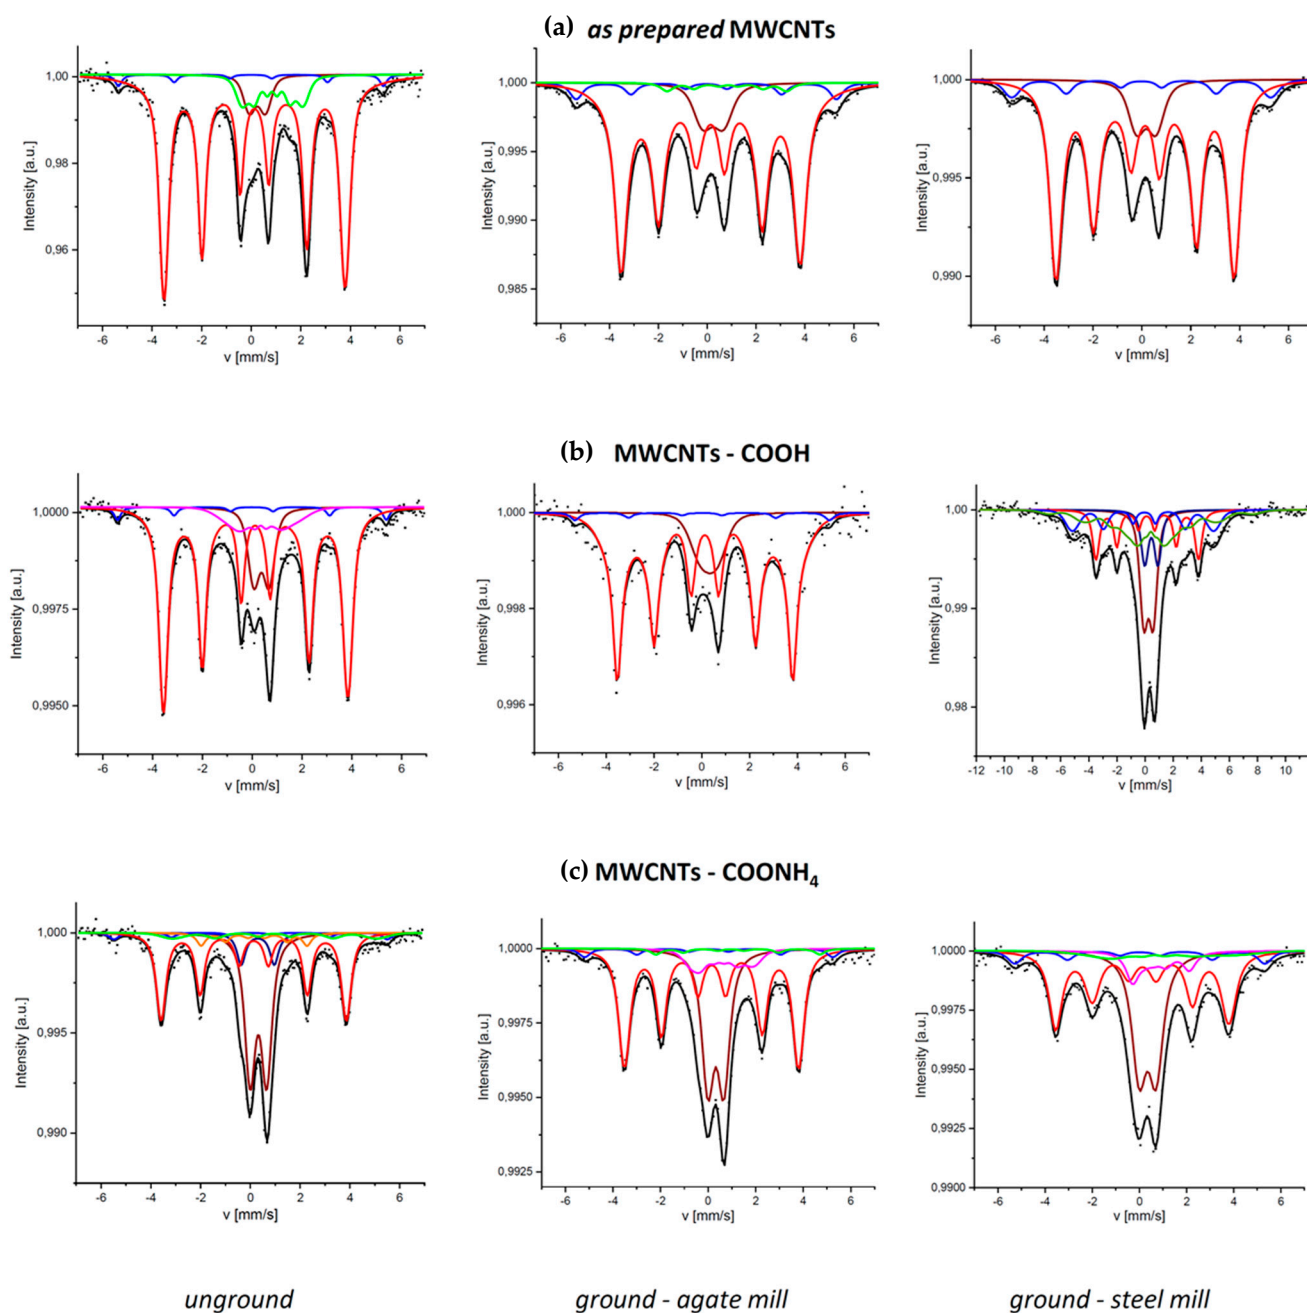

■ exp. data, — theoret. data,

Components: —  $\text{Fe}_3\text{C}$ , —  $\alpha\text{-Fe}$ , —  $\text{Fe}_x\text{C}_y$ , —  $\text{Fe}^{2+}$  in  $\text{Fe}_x\text{O}$ , —  $\text{Fe}_2\text{O}_3$  oxides, — Fe oxides/hydroxides/ferrihydrites,  
—  $\text{Fe}^{2+}/\text{Fe}^{3+}$  Par<sub>1</sub>, —  $\text{Fe}^{2+}/\text{Fe}^{3+}$  Par<sub>2</sub>

**Table 2.** Hyperfine parameters fitted to the Mössbauer spectra measured at 220 K (*IS* – isomer shift related to the metallic Fe, *QS* – quadrupole splitting, *H<sub>hf</sub>* – hyperfine magnetic field,  $\Delta Q$  – quadrupole splitting distribution,  $\Delta H$  – magnetic field distribution, *C* – relative contribution,  $\Gamma$  – line width).

| Types of MWCNTs     | MWCNTs as prepared                                                                                            |               |                                       |                                        | MWCNTs-COOH                                                                                                   |               |                                    |                                        | MWCNTs-COONH <sub>4</sub> |                           |                                |                                       |                                    |                                        |
|---------------------|---------------------------------------------------------------------------------------------------------------|---------------|---------------------------------------|----------------------------------------|---------------------------------------------------------------------------------------------------------------|---------------|------------------------------------|----------------------------------------|---------------------------|---------------------------|--------------------------------|---------------------------------------|------------------------------------|----------------------------------------|
| Component           | Fe <sub>3</sub> C                                                                                             | $\alpha$ - Fe | Fe <sup>2+</sup> in Fe <sub>x</sub> O | Par Fe <sup>2+</sup> /Fe <sup>3+</sup> | Fe <sub>3</sub> C                                                                                             | $\alpha$ - Fe | Fe oxides/hydroxides/ferrihydrites | Par Fe <sup>2+</sup> /Fe <sup>3+</sup> | Fe <sub>3</sub> C         | $\alpha$ - Fe             | Fe <sub>x</sub> C <sub>y</sub> | Fe <sup>2+</sup> in Fe <sub>x</sub> O | Fe oxides/hydroxides/ferrihydrites | Par Fe <sup>2+</sup> /Fe <sup>3+</sup> |
| control             |                                                                                                               |               |                                       |                                        |                                                                                                               |               |                                    |                                        |                           |                           |                                |                                       |                                    |                                        |
| C[%]                | 80.6±2.6                                                                                                      | 2.8±0.4       | 10.3±0.5                              | 6.4±0.6                                | 72.9±2.6                                                                                                      | 3.3±1.5       | 9.9±3.1                            | 13.9±2.0                               | 42.1±3.5                  | 3.2±2.0                   | 5.6±1.7                        | 5.4±3.5                               | -                                  | 44.4±4.0                               |
| H <sub>hf</sub> [T] | 22.7<br>$\Delta H=0.66$<br>p=0.77<br><br>33.1<br>$\Delta H=0.07$<br><br>19.5<br>$\Delta H=10.7$<br><br>p=0.23 |               | 7.6<br><br>$\Delta H=1.0$             | -                                      | 23.0<br>$\Delta H=0.60$<br>p=0.82<br><br>33.4<br>$\Delta H=0.007$<br><br>19.9<br>$\Delta H=5.3$<br><br>p=0.18 |               | 7.7±2.0<br><br>$\Delta H=3.0$      | -                                      | 23.1<br>$\Delta H=0.39$   | Q=34.0<br>$\Delta Q=0.38$ | 13.2±0.5                       | 25.4<br>$\Delta Q=2.33$               | -                                  | -                                      |

|                          |                         |            |           |                            |                              |            |           |                          |           |           |            |             |         |                                                                                                  |
|--------------------------|-------------------------|------------|-----------|----------------------------|------------------------------|------------|-----------|--------------------------|-----------|-----------|------------|-------------|---------|--------------------------------------------------------------------------------------------------|
|                          | <H>=22.0                |            |           |                            | <H>=22.4                     |            |           |                          |           |           |            |             |         |                                                                                                  |
| $\varepsilon$ /QS [mm/s] | < $\varepsilon$ >=0.002 | 0          | 0.01±0.01 | Q=0.64<br>$\Delta Q$ =0.32 | < $\varepsilon$ >=-<br>0.001 | 0          | 0.14±0.14 | 0.63<br>$\Delta Q$ =0.29 | 0.00±0.03 | 0         | -0.05±0.14 | 0.007±0.175 | -       | Q <sub>1</sub> =1.33±0.16<br>(7.8%)<br><br>Q <sub>2</sub> =0.67<br>$\Delta Q_1$ =0.18<br>(36.6%) |
| IS [mm/s]                | <IS>=0.13               | -0.01±0.02 | 0.85±0.02 | 0.25±0.04                  | <IS>=0.13                    | -0.02±0.07 | 0.37±0.17 | 0.38±0.03                | 0.14±0.01 | 0.01±0.11 | 0.20±0.14  | 0.97±0.19   | -       | IS <sub>1</sub> =0.30±0.04<br><br>IS <sub>2</sub> =0.32±0.01                                     |
| agate mill               |                         |            |           |                            |                              |            |           |                          |           |           |            |             |         |                                                                                                  |
| C[%]                     | 80.6±2.6                | 6.3±1.0    | 3.0±1.7   | 10.1±1.0                   | 82.8±5.9                     | 2.6±2.2    | -         | 14.6±2.6                 | 53.2±2.8  | 3.8±1.7   | -          | 2.4±1.9     | 9.3±2.5 | 31.2±3.5                                                                                         |
| H <sub>inf</sub> [T]     | 22.7                    | 33.0       | 15.2      | -                          | 22.7                         | 33.0       | -         | -                        | 22.71     | 32.4      | -          | 21.4        | 8.1±1.3 | -                                                                                                |



|                           |                                                                                                         |                                  |                 |                          |                                                                                                          |                        |                      |                          |                                                                                                         |                        |   |                                                                                                          |                        |                          |
|---------------------------|---------------------------------------------------------------------------------------------------------|----------------------------------|-----------------|--------------------------|----------------------------------------------------------------------------------------------------------|------------------------|----------------------|--------------------------|---------------------------------------------------------------------------------------------------------|------------------------|---|----------------------------------------------------------------------------------------------------------|------------------------|--------------------------|
|                           | $\Delta H=0.46$<br>$p=0.79$<br><br>20.7<br>$\Delta H=7.1$<br>$p=0.21$<br><br>$\langle H \rangle = 22.3$ | $\Delta H=0.5$                   | $\Delta H=0.37$ |                          | $\Delta H=0.001$<br>$p=0.57$<br><br>22.7<br>$\Delta H=3.7$<br>$p=0.43$<br><br>$\langle H \rangle = 22.7$ | $\Delta H=0.2$         |                      |                          | $\Delta H=0.55$<br>$p=0.57$<br><br>22.7<br>$\Delta H=3.7$<br>$p=0.43$<br><br>$\langle H \rangle = 22.7$ | $\Delta H=0.5$         |   | $\Delta H=0.007$<br>$p=0.57$<br><br>22.7<br>$\Delta H=3.7$<br>$p=0.43$<br><br>$\langle H \rangle = 22.7$ | $\Delta H=1.4$         |                          |
| $\varepsilon / QS$ [mm/s] | $\langle \varepsilon \rangle = -0.004$                                                                  | 0                                | -<br>0.04±0.12  | 0.84<br>$\Delta QS=0.46$ | $\langle \varepsilon \rangle = -0.002$                                                                   | 0                      | -                    | 0.71<br>$\Delta QS=0.66$ | $\langle \varepsilon \rangle = -0.007$                                                                  | 0                      | - | 0.14±0.28                                                                                                | 0.07±0.12              | 0.67<br>$\Delta QS=0.21$ |
| IS [mm/s]                 | $\langle IS \rangle = 0.13$                                                                             | -0.04±0.04                       | 0.83±0.10       | 0.24±0.03                | 0.14±0.02                                                                                                | 0.02±0.07              | -                    | 0.38±0.03                | $\langle IS \rangle = 0.15$                                                                             | 0.03±0.10              | - | 1.1±0.3                                                                                                  | 0.53±0.14              | 0.33±0.02                |
| steel mill                |                                                                                                         |                                  |                 |                          |                                                                                                          |                        |                      |                          |                                                                                                         |                        |   |                                                                                                          |                        |                          |
| C[%]                      | 81.6±1.9                                                                                                | 7.8±1.1                          | -               | 10.7±1.2                 | 20.2±2.5                                                                                                 | 15.0±2.1               | 29.6±5.0             | 35.7±3.2                 | 42.3±2.8                                                                                                | 7.3±2.0                | - | 6.3±2.5                                                                                                  | 10.0±3.6               | 34.2±2.2                 |
| $H_{bf}$ [T]              | 22.6±0.32<br>$\Delta H=0.59\pm0.11$                                                                     | 32.9±0.4<br>$\Delta H=1.2\pm0.4$ | -               | -                        | 22.6<br>$\Delta H=0.66$                                                                                  | 31.1<br>$\Delta H=2.4$ | 45<br>$\Delta H=3.0$ | -                        | 22.8<br>$\Delta H=0.44$                                                                                 | 32.9<br>$\Delta H=0.5$ | - | 17.6<br>$\Delta H=5.3$                                                                                   | 7.5<br>$\Delta H=0.01$ | -                        |

|  |            |  |  |  |  |           |  |  |  |  |  |  |  |
|--|------------|--|--|--|--|-----------|--|--|--|--|--|--|--|
|  | p=0.84     |  |  |  |  | (p=0.11)  |  |  |  |  |  |  |  |
|  |            |  |  |  |  | 35.0      |  |  |  |  |  |  |  |
|  | 15.5±2.5   |  |  |  |  | ΔH=3.0    |  |  |  |  |  |  |  |
|  | ΔH=6.2±2.4 |  |  |  |  | (p=0.039) |  |  |  |  |  |  |  |
|  | p=0.16     |  |  |  |  |           |  |  |  |  |  |  |  |
|  |            |  |  |  |  | 30.0      |  |  |  |  |  |  |  |
|  |            |  |  |  |  | ΔH=3.0    |  |  |  |  |  |  |  |
|  |            |  |  |  |  | (p=0.273) |  |  |  |  |  |  |  |
|  |            |  |  |  |  | 20.0      |  |  |  |  |  |  |  |
|  |            |  |  |  |  | ΔH=3.0    |  |  |  |  |  |  |  |
|  |            |  |  |  |  | (p=0.076) |  |  |  |  |  |  |  |
|  |            |  |  |  |  | 15.0      |  |  |  |  |  |  |  |
|  |            |  |  |  |  | ΔH=3.0    |  |  |  |  |  |  |  |
|  |            |  |  |  |  | (p=0.047) |  |  |  |  |  |  |  |

|                           |                                       |                  |   |                                 |                  |                  |                                                                           |                                                                                                     |                                        |                |   |                 |                 |                           |
|---------------------------|---------------------------------------|------------------|---|---------------------------------|------------------|------------------|---------------------------------------------------------------------------|-----------------------------------------------------------------------------------------------------|----------------------------------------|----------------|---|-----------------|-----------------|---------------------------|
|                           | $\langle H \rangle = 21,5$            |                  |   |                                 |                  |                  | 10.0<br>$\Delta H = 3.0$<br>( $p = 0.455$ )<br>$\langle H \rangle = 21.3$ |                                                                                                     |                                        |                |   |                 |                 |                           |
| $\varepsilon / QS$ [mm/s] | $\langle \varepsilon \rangle = -0.03$ | 0                | - | $Q = 0.79$<br>$\Delta Q = 0.38$ | $-0.02 \pm 0.02$ | 0                | 0.0                                                                       | $QS_1 = 0.67$<br>$\Delta QS_1 = 0.3$<br>(24.5%)<br>$QS_2 = 0.94$<br>$\Delta QS_2 = 0.24$<br>(11.2%) | $\langle \varepsilon \rangle = -0.003$ | 0              | - | $0.25 \pm 0.33$ | $0.23 \pm 0.19$ | 0.72<br>$\Delta QS = 0.2$ |
| IS [mm/s]                 | $\langle IS \rangle = 0.15$           | $-0.03 \pm 0.05$ | - | $0.18 \pm 0.04$                 | $0.13 \pm 0.03$  | $-0.10 \pm 0.11$ | $0.41 \pm 0.13$                                                           | $IS_1 = 0.25 \pm 0.4$<br>$IS_2 = 0.45 \pm 0.22$                                                     | $\langle IS \rangle = 0.13$            | $0.02 \pm 0.1$ | - | $0.87 \pm 0.15$ | $0.68 \pm 0.15$ | $0.35 \pm 0.02$           |

**Figure 2.** Mössbauer spectra for (a) as prepared MWCNTs, (b) MWCNTs-COOH, and (c) MWCNTs-COONH<sub>4</sub>: left column – the control group, middle column – after using the agate mill, right column – after using the steel mill, measured at 295 K.

295 K

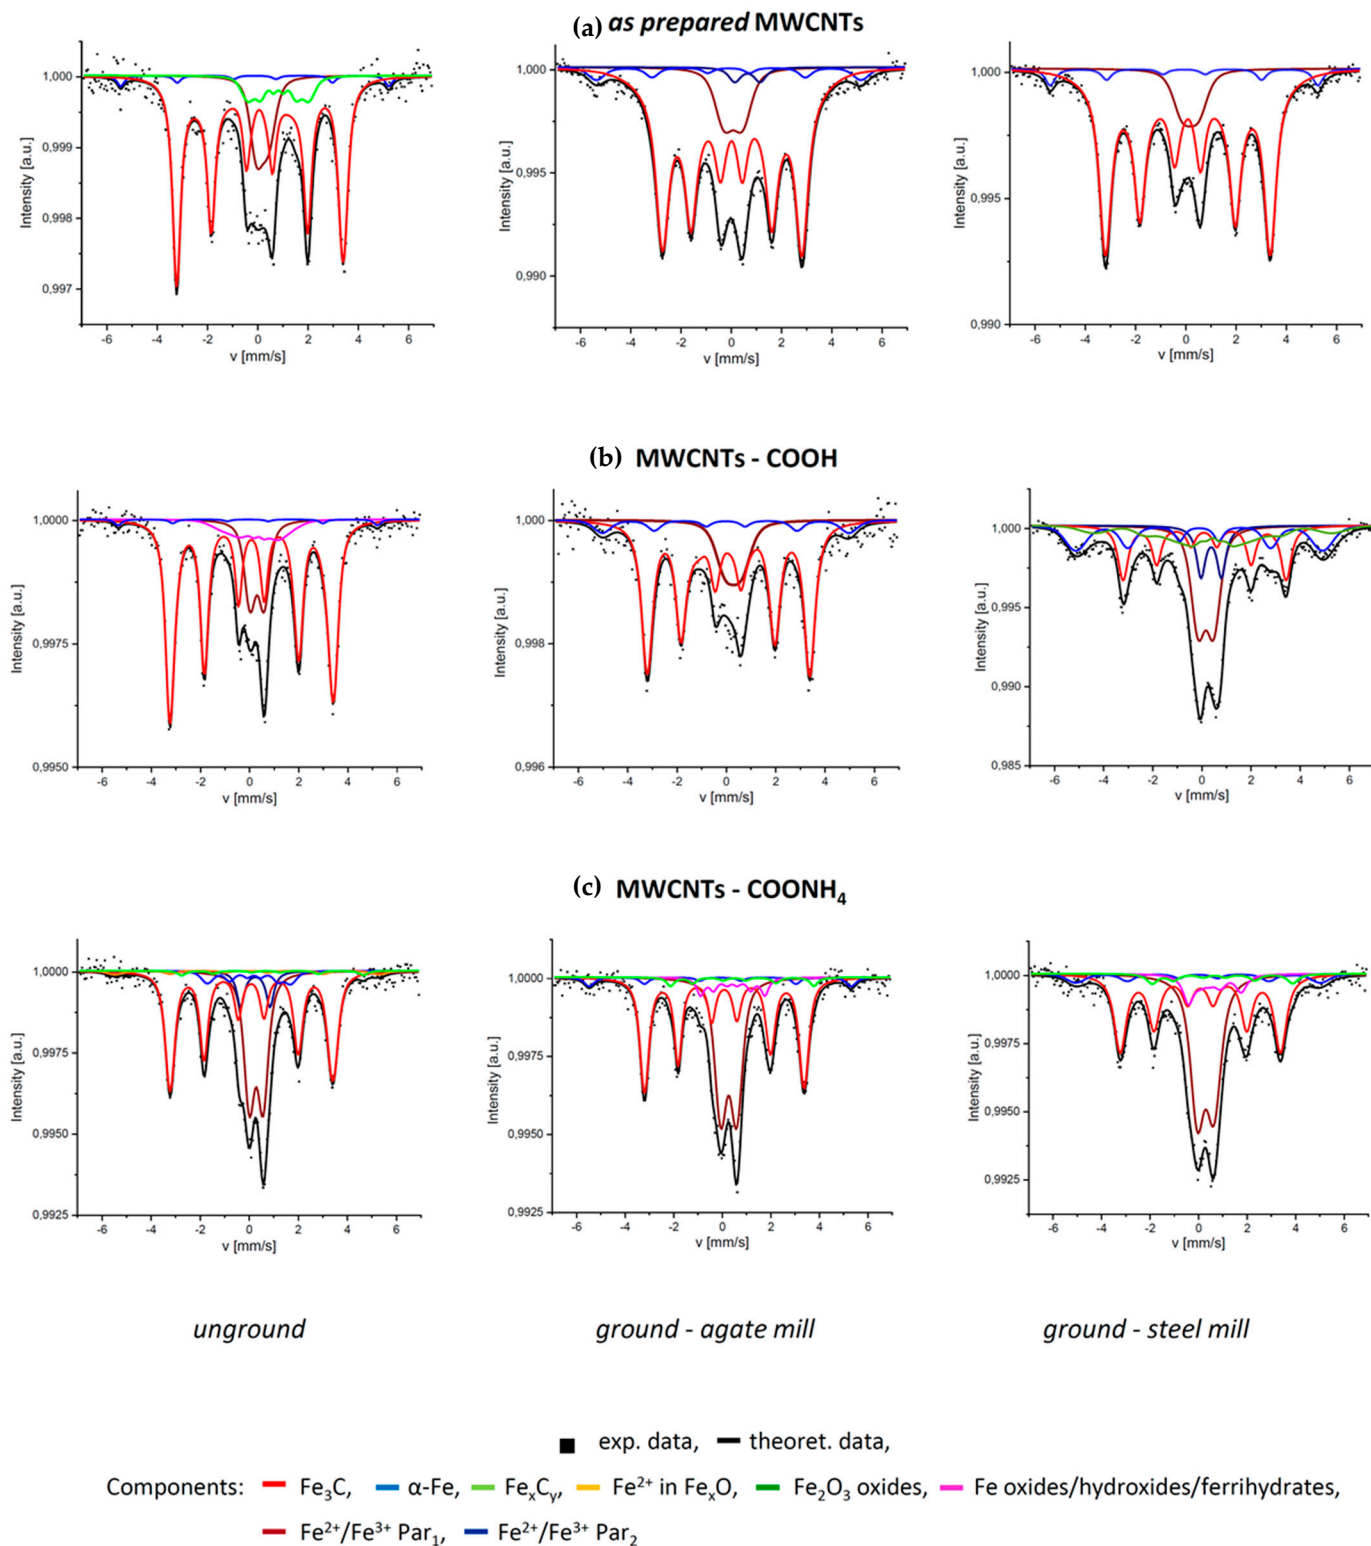

**Table 3.** Hyperfine parameters fitted to the Mössbauer spectra measured at 295 K (*IS* – isomer shift related to the metallic Fe, *QS* – quadrupole splitting, *H<sub>hf</sub>* – hyperfine magnetic field,  $\Delta Q$  - quadrupole splitting distribution,  $\Delta H$  – magnetic field distribution, *C* – relative contribution,  $\Gamma$  – line width).

| Component             | Fe <sub>3</sub> C                                                                             | $\alpha$ - Fe           | Fe <sup>2+</sup> in Fe <sub>3</sub> O | Par Fe <sup>2+</sup> /Fe <sup>3+</sup> | Fe <sub>3</sub> C                                                                              | $\alpha$ - Fe            | Fe oxides/hydroxides/ferrihydrites | Par Fe <sup>2+</sup> /Fe <sup>3+</sup> | Fe <sub>3</sub> C       | $\alpha$ - Fe            | Fe <sub>3</sub> C <sub>y</sub> | Fe <sup>2+</sup> in Fe <sub>3</sub> O | Fe oxides/hydroxides/ferrihydrites | Par Fe <sup>2+</sup> /Fe <sup>3+</sup>                                                                               |
|-----------------------|-----------------------------------------------------------------------------------------------|-------------------------|---------------------------------------|----------------------------------------|------------------------------------------------------------------------------------------------|--------------------------|------------------------------------|----------------------------------------|-------------------------|--------------------------|--------------------------------|---------------------------------------|------------------------------------|----------------------------------------------------------------------------------------------------------------------|
| control               |                                                                                               |                         |                                       |                                        |                                                                                                |                          |                                    |                                        |                         |                          |                                |                                       |                                    |                                                                                                                      |
| C[%]                  | 73.5±3.5                                                                                      | 2.9±0.8                 | 9.4±1.3                               | 14.2±3.5                               | 72.5±3.1                                                                                       | 1.8±1.0                  | 9.1±3.0                            | 16.8±2.6                               | 52.3±3.3                | 2.4±2.0                  | 6.3±2.5                        | 1.8±1.5                               | -                                  | 37.4±3.7                                                                                                             |
| H <sub>hf</sub> [T]   | 20.5<br>$\Delta H=0.41$<br>$p=0.78$<br><br>13.7<br>$\Delta H=5.0$<br>$p=0.22$<br><br><H>=19.0 | 33.0<br>$\Delta H=0.03$ | H=7.5<br>$\Delta H=1.05$              | -                                      | 20.7<br>$\Delta H=0.49$<br>$p=0.77$<br><br>19.6<br>$\Delta H=1.08$<br>$p=0.23$<br><br><H>=20.4 | 32.7<br>$\Delta H=0.002$ | 7.4<br>$\Delta H=3.0$              | -                                      | 20.6<br>$\Delta H=0.61$ | H=33.4<br>$\Delta H=1.3$ | H=10.5<br>$\Delta H=0.9$       | 22.3<br>$\Delta H=0.05$               | -                                  | -                                                                                                                    |
| $\epsilon$ /QS [mm/s] | < $\epsilon$ >=-0.029                                                                         | 0                       | 0.00±0.12                             | Q=0.48<br>$\Delta Q=0.36$              | < $\epsilon$ >=0.001                                                                           |                          | -0.07±0.17                         | 0.57<br>$\Delta Q=0.26$                | < $\epsilon$ >=0.006    | 0                        | -0.10±0.10                     | 0.13±0.26                             | -                                  | QS <sub>1</sub> = 0.56<br>$\Delta QS_1=0.22$<br>(30.5%)<br><br>QS <sub>2</sub> =1.2<br>$\Delta QS_2=0.004$<br>(6.9%) |
| IS [mm/s]             | <IS>=0.04                                                                                     | -0.12±0.22              | 0.82±0.16                             | <IS>=0.18                              | <IS>=0.07                                                                                      | -0.05±0.20               | 0.31±0.15                          | 0.30±0.03                              | <IS>=0.09               | -0.10±0.11               |                                | 0.82±0.26                             | -                                  | IS <sub>1</sub> =0.29±0.01                                                                                           |

|                     |                                                                            |                        |   |                                                                                                                             |                                                                            |                    |          |                  |                 |                |           |                 |                |                            |
|---------------------|----------------------------------------------------------------------------|------------------------|---|-----------------------------------------------------------------------------------------------------------------------------|----------------------------------------------------------------------------|--------------------|----------|------------------|-----------------|----------------|-----------|-----------------|----------------|----------------------------|
|                     |                                                                            |                        |   |                                                                                                                             |                                                                            |                    |          |                  |                 |                | 0.09±0.13 |                 |                | IS <sub>2</sub> =0.25±0.05 |
| <b>agate mill</b>   |                                                                            |                        |   |                                                                                                                             |                                                                            |                    |          |                  |                 |                |           |                 |                |                            |
| C[%]                | 80.4±1.5                                                                   | 5.3±1.3                | - | 14.3±3.0                                                                                                                    | 76.3±1.1                                                                   | 8.0±3.5            | -        | 15.7±2.9         | 49.7±3.0        | 4.2±1.5        | -         | 3.4±1.6         | 6.8±2.1        | 35.9±2.0                   |
| H <sub>hr</sub> [T] | 17.23<br>ΔH=0.53<br>p=0.63<br><br>15.1<br>ΔH=6.1<br>p=0.37<br><br><H>=16.4 | 32.7±0.6<br><br>ΔH=1.2 | - | -                                                                                                                           | 20.51<br>ΔH=0.41<br>p=0.90<br><br>10.5<br>ΔH=1.2<br>p=0.10<br><br><H>=19.4 | 31.0<br><br>ΔH=1.4 | -        | -                | 20.4<br>ΔH=0.50 | 33.4<br>ΔH=0.6 | -         | 18.3<br>ΔH=0.04 | 8.2<br>ΔH=0.02 | -                          |
| ε /QS [mm/s]        | < ε >=0.02                                                                 | 0                      | - | QS <sub>1</sub> = 0.73<br>ΔQS <sub>1</sub> =0.45<br>(11.9%)<br><br>QS <sub>2</sub> =1.0<br>ΔQS <sub>2</sub> =0.16<br>(2.4%) | < ε >=0.03                                                                 | 0                  | -        | 0.65<br>ΔQS=0.52 | < ε >=-0.001    | 0              | -         | 0.16±0.14       | 0.01±0.07      | 0.65<br>ΔQS=0.29           |
| IS [mm/s]           | <IS>=0.03                                                                  | -0.10±0.09             | - | IS <sub>1</sub> =0.08±0.04<br><br>IS <sub>2</sub> =0.64±0.12                                                                | <IS>=0.07                                                                  | -0.03±0.17         | -        | 0.28±0.08        | <IS>=0.09       | -0.08±0.10     | -         | 0.66±0.14       | 0.42±0.08      | 0.27±0.01                  |
| <b>steel mill</b>   |                                                                            |                        |   |                                                                                                                             |                                                                            |                    |          |                  |                 |                |           |                 |                |                            |
| C[%]                | 83.8±2.3                                                                   | 5.6±1.5                | - | 10.6±2.4                                                                                                                    | 24.3±2.0                                                                   | 19.4±1.9           | 18.6±3.5 | 37.6±3.2         | 40.9±3.8        | 6.5±2.0        | -         | 4.8±2.0         | 8.6±1.6        | 39.2±3.8                   |

|                             |                                                                                                                    |                         |   |                           |                         |                        |                                                                                                                                                                    |              |                             |                             |           |                         |                          |   |
|-----------------------------|--------------------------------------------------------------------------------------------------------------------|-------------------------|---|---------------------------|-------------------------|------------------------|--------------------------------------------------------------------------------------------------------------------------------------------------------------------|--------------|-----------------------------|-----------------------------|-----------|-------------------------|--------------------------|---|
| $H_{hf}$ [T]                | 20.35<br>$\Delta H=0.51$<br><br>p=0.71<br><br>17.1<br>$\Delta H=6.7$<br><br>p=0.29<br><br>$\langle H \rangle=19.4$ | 33.0<br>$\Delta H=0.03$ | - | -                         | 20.6<br>$\Delta H=0.44$ | 31.1<br>$\Delta H=2.0$ | 30.0<br>$\Delta H=3.0$<br><br>(p=0.40)<br><br>15.0<br>$\Delta H=3.0$<br><br>(p=0.08)<br><br>10.0<br>$\Delta H=3.0$<br><br>(p=0.52)<br><br>$\langle H \rangle=18.3$ | -            | 20.5±0.1<br>$\Delta H=0.48$ | 31.6±1.5<br>$\Delta H=1.97$ | -         | 18.0<br>$\Delta H=0.02$ | 6.8<br>$\Delta H=0.05$   | - |
| $\varepsilon$ /QS<br>[mm/s] | $\langle \varepsilon \rangle=0.000$                                                                                | 0                       | - | Q=0.63<br>$\Delta Q=0.48$ | 0.01±0.01               | 0                      | 0.0<br><br>QS <sub>1</sub> =0.63<br>$\Delta QS_1=0.33$<br><br>(27.3%)<br><br>QS <sub>2</sub> =0.83<br>$\Delta QS_2=0.02$<br><br>(10.3%)                            | -0.001±0.025 | 0                           | -                           | 0.17±0.16 | 0.20±0.18               | 0.68<br>$\Delta QS=0.28$ |   |
| IS [mm/s]                   | $\langle IS \rangle = 0.08$                                                                                        | -0.07±0.07              | - | 0.18±0.05                 | 0.10±0.01               | -0.10±0.11             | 0.44±0.12<br><br>IS <sub>1</sub> =0.16±0.02<br><br>IS <sub>2</sub> =0.38±0.03                                                                                      | 0.07±0.03    | -0.1±0.1                    | -                           | 0.82±0.16 | 0.45±0.10               | 0.26±0.05                |   |

**Table 4.** Metal and semimetal concentrations of MWCNTs obtained by use of ICP-OES method. Concentrations are given in [ $\mu\text{g/g}$ ]. n.d. – below the detection limit.

| Element     | as prepared MWCNTs | MWCNTs-COOH     | MWCNTs-COONH <sub>4</sub> |
|-------------|--------------------|-----------------|---------------------------|
| control     |                    |                 |                           |
| Al          | 154 $\pm$ 2        | 35.5 $\pm$ 0.1  | 11.9 $\pm$ 0.1            |
| As          | 69.9 $\pm$ 1.4     | 11.7 $\pm$ 0.5  | 14.4 $\pm$ 0.8            |
| B           | 126 $\pm$ 4        | 19.8 $\pm$ 0.1  | 24 $\pm$ 0.2              |
| Ca          | 30.8 $\pm$ 0.8     | 143 $\pm$ 2     | 41 $\pm$ 1                |
| Cd          | 2.1 $\pm$ 0.4      | n.d.            | n.d.                      |
| Cr          | 4.0 $\pm$ 0.7      | n.d.            | n.d.                      |
| Cu          | 6.2 $\pm$ 0.3      | 0.53 $\pm$ 0.01 | 1.1 $\pm$ 0.1             |
| Fe          | 342 $\pm$ 2        | 54.4 $\pm$ 0.2  | 56.9 $\pm$ 0.3            |
| Hg          | 250 $\pm$ 38       | 4.2 $\pm$ 1.1   | 4.9 $\pm$ 3.0             |
| K           | 5.8 $\pm$ 1.5      | 12.4 $\pm$ 0.8  | 3.1 $\pm$ 0.3             |
| Mg          | n.d.               | 4.26 $\pm$ 0.05 | 1.64 $\pm$ 0.06           |
| Mo          | 3.2 $\pm$ 0.5      | n.d.            | n.d.                      |
| Na          | 21.4 $\pm$ 0.5     | 12.1 $\pm$ 0.3  | 5.6 $\pm$ 0.1             |
| Sb          | 29 $\pm$ 3         | 1.4 $\pm$ 0.5   | n.d.                      |
| Si          | 23.9 $\pm$ 0.5     | 19.2 $\pm$ 0.9  | 12.5 $\pm$ 1.1            |
| V           | 1.6 $\pm$ 0.2      | n.d.            | n.d.                      |
| W           | 15.2 $\pm$ 1.7     | n.d.            | 1.3 $\pm$ 0.1             |
| agate mill* |                    |                 |                           |
| Fe          | 330 $\pm$ 3        | 53.1 $\pm$ 0.4  | 54.6 $\pm$ 0.4            |
| steel mill* |                    |                 |                           |
| Fe          | 334 $\pm$ 4        | 54.0 $\pm$ 0.4  | 55.5 $\pm$ 0.4            |

\*The contents of other elements in the ground samples did not change.

**Figure 3.** Temperature dependencies of the magnetic moment ( $\mu$ ) measured in the field of 4 T for MWCNTs-COOH obtained from MWCNTs prepared in the agate (blue squares) and steel (red circles) mill. Empty symbols denote the data as measured and full symbols correspond to the values corrected for the carbon contribution.

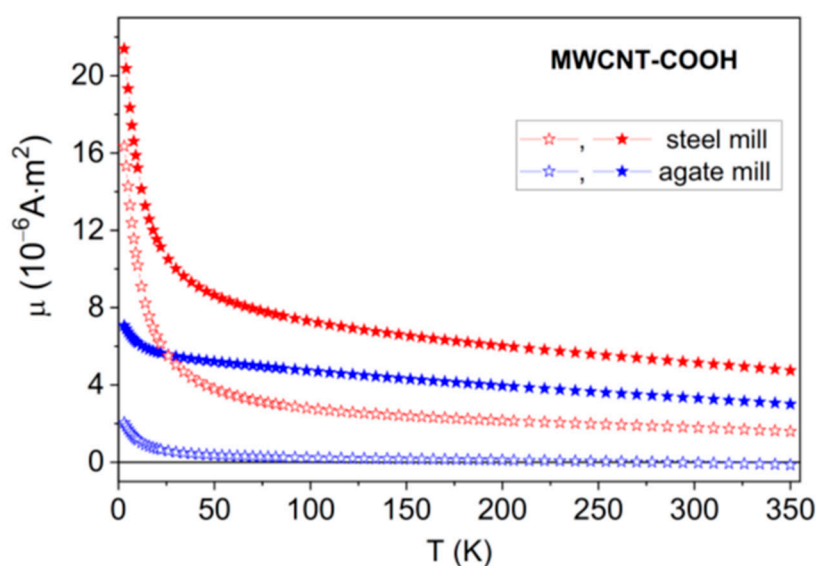

**Figure 4.** TEM image of a large nanoparticle in MWCNTs-COOH and an experimental evidence (EDX measurements) that it contains Fe, C and O is given.



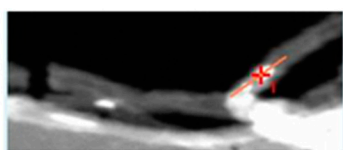

## MWCNT-COOH steel mill

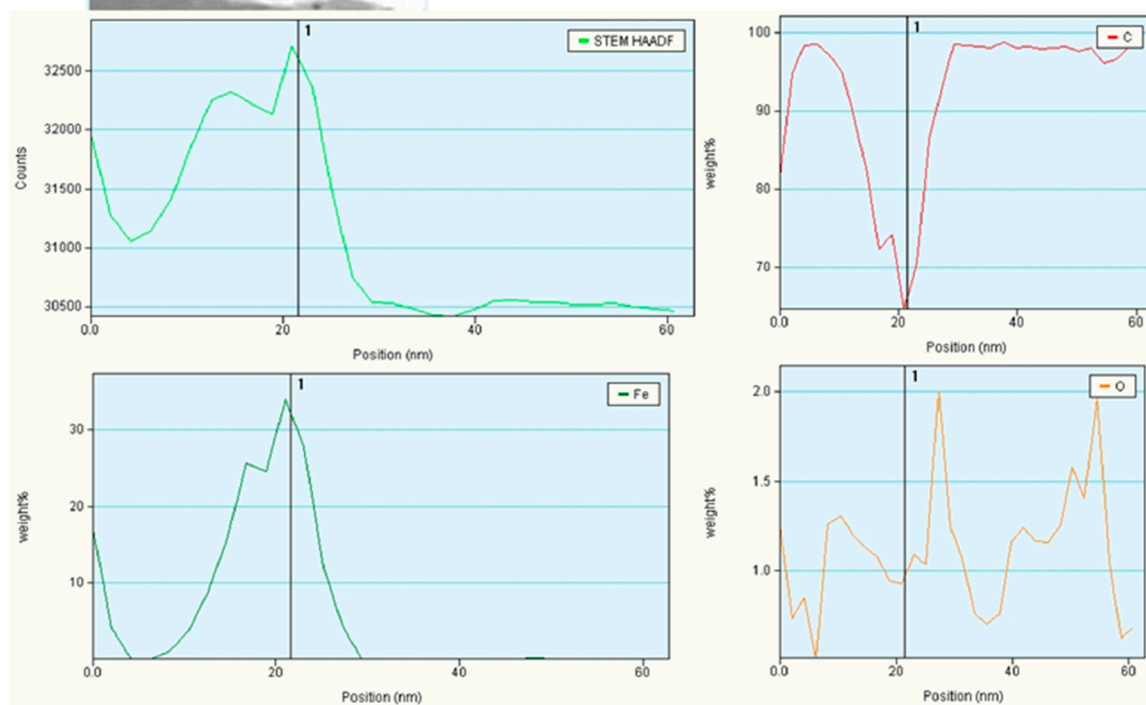

Supplement: s1 [file s1]
